# Supplementary material
Source: Springer Nature journal article supplement (https://www.springermedizin.de/resource/supplementary/12889_2014_6650_MOESM1_ESM.pdf/9498678)

## Active group (n=141)

## Inactive group (n=90)

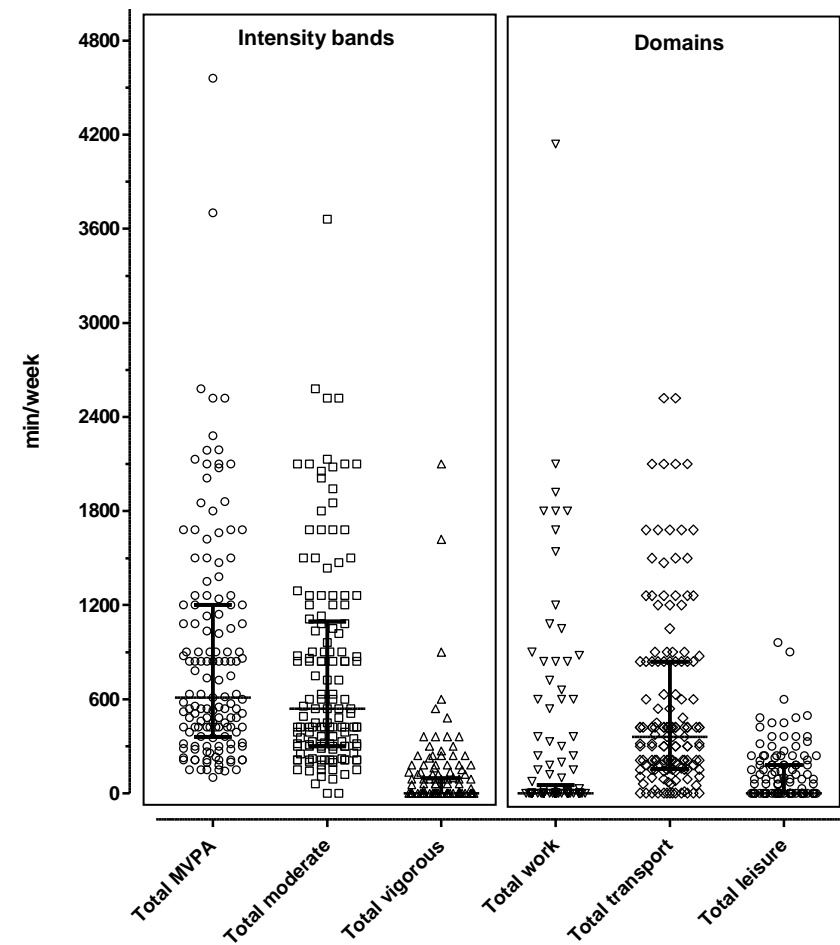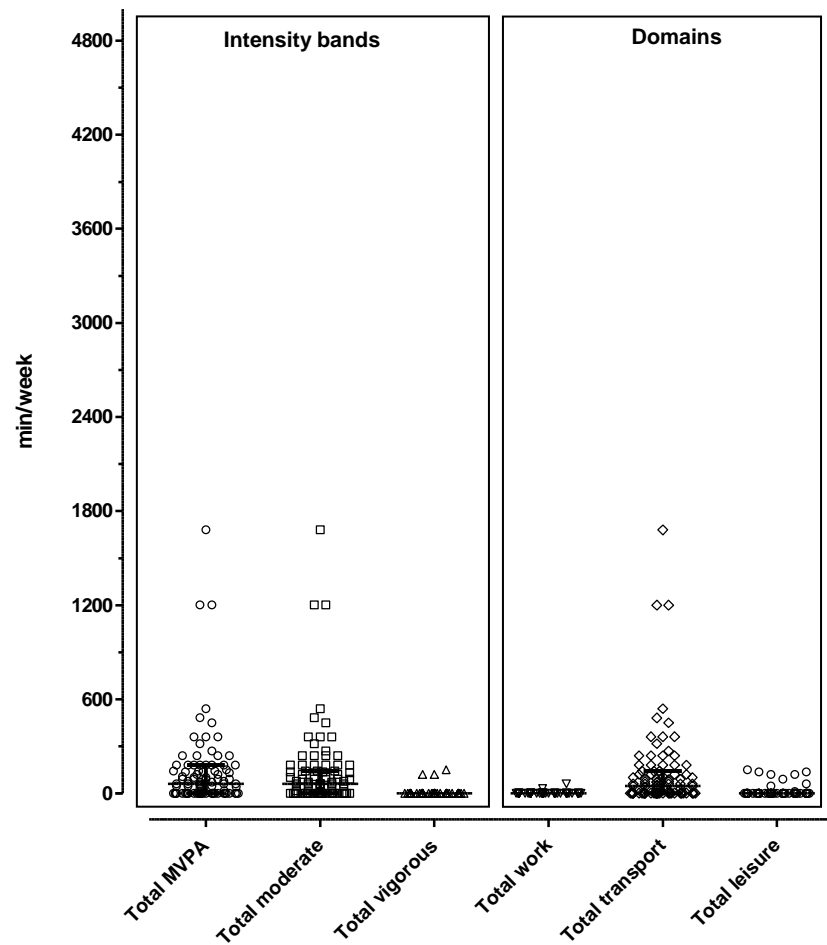

Supplement: MOESM1 [file 9498678]
